# Supplementary material
Source: ML conference proceedings conference paper supplement (https://proceedings.mlr.press/v80/pretorius18a.html)
Supplement: Supplementary file [file pretorius18a-supp.pdf]

---

## Supplementary material: Learning Dynamics of Linear Denoising Autoencoders

---

### Supplementary material

The following section provides detail omitted in the paper regarding the derivation of certain equations as well as additional comments.

#### A. Expected loss for linear DAEs

We derive the expected reconstruction loss over the noise distribution as presented in (1) in the paper. The expected loss can be written as

$$\mathbb{E}_\epsilon[\mathcal{L}] = \frac{1}{2N} \sum_{i=1}^N \mathbb{E}_\epsilon [ \|\mathbf{x}_i - W_2 W_1 \tilde{\mathbf{x}}_i\|^2 ].$$

where  $\tilde{\mathbf{x}}_i = \mathbf{x}_i + \epsilon_i$ , with  $\epsilon$  sampled from an isotropic noise distribution with component variance  $s^2$ . Let  $SE(\tilde{\mathbf{x}}_i) = \|\mathbf{x}_i - W_2 W_1 \tilde{\mathbf{x}}_i\|^2$  and  $M = W_2 W_1$ . Then

$$\begin{aligned} \mathbb{E}_\epsilon [SE(\tilde{\mathbf{x}}_i)] &= \mathbb{E}_\epsilon [ \|(I - M)\mathbf{x}_i + M(\mathbf{x}_i - \tilde{\mathbf{x}}_i)\|^2 ] \\ &= SE(\mathbf{x}_i) + \mathbb{E}_\epsilon [ \|M(\mathbf{x}_i - \tilde{\mathbf{x}}_i)\|^2 ] \end{aligned}$$

because the cross product terms vanish, since  $\mathbb{E}_\epsilon [\tilde{\mathbf{x}}_i] = \mathbf{x}_i$ :

$$\begin{aligned} 0 &= \mathbb{E}_\epsilon [ \mathbf{x}_i^T (I - M)^T M (\mathbf{x}_i - \tilde{\mathbf{x}}_i) ] \\ &= \mathbb{E}_\epsilon [ (\mathbf{x}_i - \tilde{\mathbf{x}}_i)^T M^T (I - M) \mathbf{x}_i ]. \end{aligned}$$

We also have that

$$\begin{aligned} \|M(\mathbf{x}_i - \tilde{\mathbf{x}}_i)\|^2 &= (\mathbf{x}_i - \tilde{\mathbf{x}}_i)^T M^T M (\mathbf{x}_i - \tilde{\mathbf{x}}_i) \\ &= \text{tr} [ (\mathbf{x}_i - \tilde{\mathbf{x}}_i)^T M^T M (\mathbf{x}_i - \tilde{\mathbf{x}}_i) ] \\ &= \text{tr} [ M(\mathbf{x}_i - \tilde{\mathbf{x}}_i)(\mathbf{x}_i - \tilde{\mathbf{x}}_i)^T M^T ] \\ &= \text{tr} [ M \epsilon_i \epsilon_i^T M^T ] \end{aligned}$$

due to the invariance of the trace under cycle permutation of products. Therefore, in expectation over the noise we have

$$\mathbb{E}_\epsilon [ \|M(\mathbf{x}_i - \tilde{\mathbf{x}}_i)\|^2 ] = \text{tr} [ M(s^2 I) M^T ],$$

and as a result

$$\begin{aligned} \mathbb{E}_\epsilon [\mathcal{L}] &= \frac{1}{2N} \sum_{i=1}^N \|\mathbf{x}_i - W_2 W_1 \mathbf{x}_i\|^2 \\ &\quad + \frac{s^2}{2} \text{tr} (W_2 W_1 W_1^T W_2^T). \end{aligned}$$

#### B. Learning dynamics for linear DAEs

We derive the expression for the learning dynamics of a linear DAE as presented in (5) in the paper. As departure point, we start by examining the expected scalar update equations over the noise model for a small learning rate  $\alpha$ , which can be written as

$$\begin{aligned} \tau \frac{d}{dt} w_1 &= w_2 (\lambda - w_2 w_1 \lambda) - \epsilon w_2^2 w_1 \\ \tau \frac{d}{dt} w_2 &= w_1 (\lambda - w_2 w_1 \lambda) - \epsilon w_2 w_1^2. \end{aligned}$$

where  $\tau = \frac{N}{\alpha}$ , with  $N$  representing the number of training samples. Define  $w = w_2 w_1$  and using the product rule the update for  $w$  then becomes

$$\begin{aligned} \tau \frac{d}{dt} w &= \tau [ w_1 \frac{d}{dt} w_2 + w_2 \frac{d}{dt} w_1 ] \\ &= w_1^2 (\lambda - w_2 w_1 (\lambda + \epsilon)) + w_2^2 (\lambda - w_2 w_1 (\lambda + \epsilon)) \\ &= (\lambda - w(\lambda + \epsilon))(w_1^2 + w_2^2). \end{aligned} \quad (1)$$

Next we make the following hyperbolic change of coordinates

$$\begin{aligned} w_1 &= \sqrt{c_0} \sinh\left(\frac{\theta}{2}\right), w_2 = \sqrt{c_0} \cosh\left(\frac{\theta}{2}\right), \text{ for } w_1^2 < w_2^2 \\ w_1 &= \sqrt{c_0} \cosh\left(\frac{\theta}{2}\right), w_2 = \sqrt{c_0} \sinh\left(\frac{\theta}{2}\right), \text{ for } w_1^2 > w_2^2, \end{aligned}$$

where  $\theta$  parameterises points along the dynamics trajectory represented by  $w_2^2 - w_1^2 = \pm c_0$  (Saxe et al., 2013). Note that with this change of coordinates we obtain

$$\begin{aligned} w &= c_0 \cosh\left(\frac{\theta}{2}\right) \sinh\left(\frac{\theta}{2}\right) \\ &= c_0 \left( \frac{e^{\frac{\theta}{2}} + e^{-\frac{\theta}{2}}}{2} \right) \left( \frac{e^{\frac{\theta}{2}} - e^{-\frac{\theta}{2}}}{2} \right) \\ &= \frac{c_0}{2} \left( \frac{e^\theta - e^{-\theta}}{2} \right) \\ &= \frac{c_0}{2} \sinh(\theta), \end{aligned}$$

so that

$$dw = \frac{c_0}{2} \cosh(\theta) d\theta.$$

Similarly,

$$\begin{aligned}
 w_2^2 + w_1^2 &= c_0 \cosh^2\left(\frac{\theta}{2}\right) + c_0 \sinh^2\left(\frac{\theta}{2}\right) \\
 &= c_0 \left(\frac{e^{\frac{\theta}{2}} + e^{-\frac{\theta}{2}}}{2}\right)^2 + c_0 \left(\frac{e^{\frac{\theta}{2}} - e^{-\frac{\theta}{2}}}{2}\right)^2 \\
 &= \frac{c_0}{4} (e^\theta + 2 + e^{-\theta} + e^\theta - 2 + e^{-\theta}) \\
 &= c_0 \left(\frac{e^\theta + e^{-\theta}}{2}\right) \\
 &= c_0 \cosh(\theta)
 \end{aligned}$$

Plugging these results into the update for  $w$  given in (1), yields

$$\frac{\tau c_0 \cosh(\theta)}{2} \frac{d\theta}{dt} = \left(\lambda - \frac{c_0}{2} \sinh(\theta)(\lambda + \varepsilon)\right) c_0 \cosh(\theta),$$

and as a result,

$$\tau \frac{d\theta}{dt} = \lambda (2 - \beta \sinh(\theta)),$$

where  $\beta = c_0 (1 + \frac{\varepsilon}{\lambda})$ . To solve for  $t$ , we write

$$t = \int_{\theta_0}^{\theta_f} \frac{\tau}{\lambda (2 - \beta \sinh(\theta))} d\theta$$

and integrate:

$$t = \frac{\tau}{\zeta \lambda} \left[ \ln \left( \frac{\zeta + \beta + 2 \tanh(\frac{\theta}{2})}{\zeta - \beta - 2 \tanh(\frac{\theta}{2})} \right) \right]_{\theta_0}^{\theta_f}$$

where  $\zeta = \sqrt{\beta^2 + 4}$  and initial parameter value  $\theta_0 = \sinh^{-1}(2w/c_0)$ . Let  $\delta_0 = \tanh(\frac{\theta_0}{2})$  and  $\delta_f = \tanh(\frac{\theta_f}{2})$ , then

$$t = \frac{\tau}{\lambda \zeta} \ln \frac{(\zeta + \beta + 2\delta_f)(\zeta - \beta - 2\delta_0)}{(\zeta - \beta - 2\delta_f)(\zeta + \beta + 2\delta_0)},$$

so that

$$e^{\lambda \zeta t / \tau} = \frac{(\zeta + \beta + 2\delta_f)(\zeta - \beta - 2\delta_0)}{(\zeta - \beta - 2\delta_f)(\zeta + \beta + 2\delta_0)}.$$

Multiplying by the denominator, expanding, and defining  $E = e^{\lambda \zeta t / \tau}$ , we obtain

$$\begin{aligned}
 &-2E\delta_f(\zeta + \beta + 2\delta_0) \\
 &+ E(\zeta^2 + 2\zeta\delta_0 - \beta^2 - 2\beta\delta_0) \\
 &= 2\delta_f(\zeta - \beta - 2\delta_0) \\
 &+ (\zeta^2 - 2\zeta\delta_0 - \beta^2 - 2\beta\delta_0),
 \end{aligned}$$

which yields

$$\begin{aligned}
 &\delta_f((1-E)(2\beta + 4\delta_0) - 2(E+1)\zeta) \\
 &= (1-E)(\zeta^2 - \beta^2 - 2\beta\delta_0) - 2(1+E)\zeta\delta_0.
 \end{aligned}$$

Solving for  $\theta_f(t)$ , we obtain the hyperbolic parameter equation

$$\theta_f(t) = 2 \tanh^{-1} \left[ \frac{(1-E)(\zeta^2 - \beta^2 - 2\beta\delta_0) - 2(1+E)\zeta\delta_0}{(1-E)(2\beta + 4\delta_0) - 2(1+E)\zeta} \right]$$

where  $\delta = \tanh(\frac{\theta_0}{2})$ . Using

$$w(t) = \frac{c_0}{2} \sinh(\theta_t),$$

(where  $\theta_t = \theta_f(t)$ ) to track the weight trajectory gives equation (5) in the paper.

### C. Learning dynamics for linear WDAEs

We derive the expression for the learning dynamics of a linear WDAE as presented in (7) in the paper. Reconstruction loss with weight decay gives the scalar loss associated with an eigenvalue  $\lambda$  as

$$\ell_\gamma = \frac{\lambda}{2\tau} (1 - w_2 w_1)^2 + \frac{N\gamma}{2\tau} (w_1^2 + w_2^2),$$

where  $\gamma$  is the penalty parameter that controls the amount of regularisation that is being applied. The update equations for the weights then follow as

$$\begin{aligned}
 \tau \frac{d}{dt} w_1 &= w_2(\lambda - w_2 w_1 \lambda) - N\gamma w_1 \\
 \tau \frac{d}{dt} w_2 &= w_1(\lambda - w_2 w_1 \lambda) - N\gamma w_2,
 \end{aligned}$$

assuming the initial  $w_2 = w_1$  (which holds approximately for small initial values), we have for  $w = w_2 w_1$  that

$$\begin{aligned}
 \tau \frac{d}{dt} w &= 2w(\lambda - w\lambda) - 2N\gamma w \\
 &= 2w(\lambda - N\gamma - w\lambda).
 \end{aligned}$$

Thus,

$$\begin{aligned}
 t &= \int_{w_0}^{w_f} \frac{\tau}{2w(\lambda - N\gamma - w\lambda)} dw \\
 &= \frac{\tau}{2} \left[ \frac{\ln(w) - \ln(\lambda - N\gamma - w\lambda)}{\lambda - N\gamma} \right]_{w_0}^{w_f} \\
 &= \frac{\tau}{2(\lambda - N\gamma)} \ln \left( \frac{w_f(\lambda - N\gamma - w_0\lambda)}{w_0(\lambda - N\gamma - w_f\lambda)} \right).
 \end{aligned}$$

Then solving for  $w_f$  gives

$$w_f(t) = \frac{\xi E_\gamma}{E_\gamma - 1 + \xi/w_0},$$

where  $E_\gamma = e^{2\zeta t / \tau}$  and  $\xi = (1 - N\gamma/\lambda)$ .

#### D. Optimal learning rates

We derive expressions for the optimal learning rates for linear DAEs and WDAEs as presented in (8) in the paper. First, consider the expected scalar DAE loss

$$\ell_\varepsilon = \frac{\lambda}{2\tau}(1 - w_2w_1)^2 + \frac{\varepsilon}{2\tau}(w_2w_1)^2.$$

The Hessian of  $\ell_\varepsilon$  is given by

$$H = \begin{bmatrix} \frac{\partial^2 \ell_\varepsilon}{\partial w_1^2} & \frac{\partial^2 \ell_\varepsilon}{\partial w_1 \partial w_2} \\ \frac{\partial^2 \ell_\varepsilon}{\partial w_2 \partial w_1} & \frac{\partial^2 \ell_\varepsilon}{\partial w_2^2} \end{bmatrix},$$

where

$$\begin{aligned} \frac{\partial^2 \ell_\varepsilon}{\partial w_1^2} &= \frac{w_2^2}{\tau}(\lambda + \varepsilon), \\ \frac{\partial^2 \ell_\varepsilon}{\partial w_2^2} &= \frac{w_1^2}{\tau}(\lambda + \varepsilon), \\ \frac{\partial^2 \ell_\varepsilon}{\partial w_1 \partial w_2} &= \frac{\partial^2 \ell_\varepsilon}{\partial w_2 \partial w_1} = \frac{2w_2w_1}{\tau}(\lambda + \varepsilon) - \frac{\lambda}{\tau}. \end{aligned}$$

Now, if we assume  $w_2 = w_1$ , and let  $a = \frac{\partial^2 \ell_\varepsilon}{\partial w_1^2} = \frac{\partial^2 \ell_\varepsilon}{\partial w_2^2}$  and  $b = \frac{\partial^2 \ell_\varepsilon}{\partial w_2 \partial w_1}$ , the eigenvalues for the Hessian can be shown to be  $\lambda_H = a - b$  or  $\lambda_H = a + b$ . The second order update for a single weight  $w$  at time  $t$  is then given by

$$w^{t+1} = w^t - \left( \frac{\partial \ell_\varepsilon}{\partial w^t} \right) / \lambda_H,$$

where the maximum  $\lambda_H$ , is when  $w_2 = w_1 = 1$ , such that

$$\begin{aligned} \lambda_H &= \frac{1}{\tau}(\lambda + \varepsilon) + \frac{2}{\tau}(\lambda + \varepsilon) - \frac{\lambda}{\tau} \\ &= \frac{2\lambda + 3\varepsilon}{\tau}. \end{aligned}$$

Therefore, the optimal learning rate is

$$\alpha_\varepsilon = 1/\lambda_H = \frac{\tau}{2\lambda + 3\varepsilon}.$$

For WDAEs with penalty parameter  $\gamma$ , a very similar derivation gives

$$\alpha_\gamma = \frac{\tau}{2\lambda + \gamma}.$$

Taking the ratio of the optimal DAE rate to that for the WDAE gives

$$R = \frac{\alpha_\varepsilon}{\alpha_\gamma} = \frac{2\lambda + \gamma}{2\lambda + 3\varepsilon}.$$

#### E. Equivalent scalar solutions

In Section 4 of the paper, the DAE fixed point solution is shown to be

$$w_\varepsilon^* = \frac{\lambda}{\lambda + \varepsilon}.$$

Now if  $w = w_2w_1$  and  $w_2 = w_1$ , then for WDAE we have that the scalar loss is given by

$$\ell_\gamma = \frac{\lambda}{2\tau}(1 - w)^2 + \frac{\gamma}{\tau}w,$$

and

$$\frac{\partial \ell_\gamma}{\partial w} = -\frac{\lambda}{\tau}(1 - w) + \frac{\gamma}{\tau}.$$

Setting the above equal to zero and solving gives

$$w_\gamma^* = 1 - \gamma/\lambda.$$

To obtain the value of  $\gamma$  for which the two fixed points are equal, we set  $w_\gamma^* = w_\varepsilon^*$  and solve for  $\gamma$  to find

$$\gamma = \frac{\lambda\varepsilon}{\lambda + \varepsilon}.$$

#### F. Estimated dynamics for nonlinear networks

The dynamics for the nonlinear networks trained in Figure 6 in the paper were estimated using the following approach. First, compute

$$\Sigma_{xx} = \sum_{i=1}^N \mathbf{x}_i \mathbf{x}_i^T = V \Lambda V^T,$$

using an eigen-decomposition giving eigenvalues  $\lambda_j$ ,  $j = 1, \dots, D$ . Then at regular intervals compute

$$\hat{\Sigma}_{xx}(t) = \sum_{i=1}^N \mathbf{x}_i \hat{\mathbf{x}}_i(t)^T,$$

where  $\hat{\mathbf{x}}(t)$  is the estimated reconstruction of input at time  $t$  generated by the autoencoder network. Finally, using the following rotation to obtain the diagonal matrix

$$\hat{\Lambda}(t) = V^T \hat{\Sigma}_{xx}(t) V,$$

where the diagonal contains the estimated eigenvalues  $\hat{\lambda}_j(t)$ , we can compute an estimate for the identity mapping associated with each eigenvalue as  $\hat{\lambda}_j(t)/\lambda_j \in [0, 1]$ .

#### G. Learning dynamics for tanh autoencoder networks

We investigated the dynamics of learning for nonlinear AEs, WDAEs and DAEs, using tanh activations.

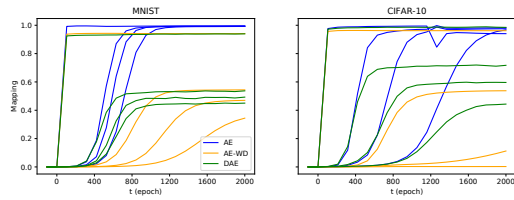

Figure 1. Learning dynamics for nonlinear networks using  $\tanh$  activation. AE (blue), WDAE (orange) and DAE (green). **Left:** MNIST **Right:** CIFAR-10.

Figure 1 shows the dynamics for these networks trained on MNIST ( $N = 50000$ ) and CIFAR-10 ( $N = 30000$ ) with equal learning rates. For the DAE, the input was corrupted using sampled Gaussian noise with mean zero and  $\sigma^2 = 2$ . For the WDAE, the amount of weight decay was set to  $\gamma = 0.0045$ . During the course of training, the identity mapping associated with each eigenvalue was estimated using the approach described in Section F, at equally spaced intervals of size 100 epochs.

## References

Saxe, A. M., McClelland, J. L., and Ganguli, S. Exact solutions to the nonlinear dynamics of learning in deep linear neural networks. *arXiv:1312.6120*, 2013.
